# Supplementary material for: Baseline antibody profiles predict toxicity in melanoma patients treated with immune checkpoint inhibitors
Source: Springer Nature journal article supplement (doi:10.1186/s12967-018-1452-4), 2018-04-02
Supplement: MOESM3 [file 15583058]

# Supplementary Figure S1

**A**

Pre- vs. post-anti-CTLA-4 treatment reproducibility

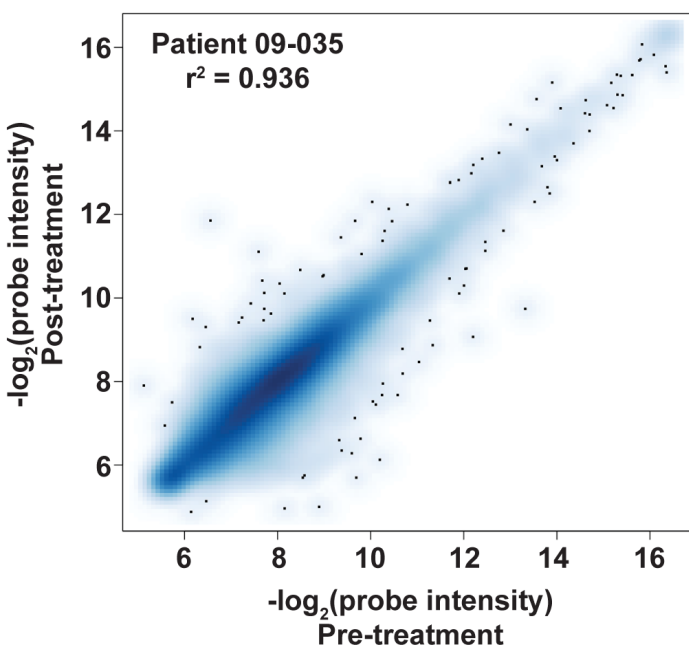

**B**

| Patient       | Correlation ( $r^2$ ) |
|---------------|-----------------------|
| 08-027        | 0.7683                |
| 09-035        | 0.936                 |
| 09-213        | 0.9433                |
| 10-070        | 0.9298                |
| 10-248        | 0.9407                |
| 10-262        | 0.8467                |
| 11-018        | 0.8601                |
| 11-022        | 0.8601                |
| 11-070        | 0.8887                |
| 11-073        | 0.9598                |
| 11-086        | 0.9446                |
| 11-105        | 0.916                 |
| 11-125        | 0.844                 |
| 11-139        | 0.9273                |
| 11-175        | 0.9572                |
| 11-177        | 0.9508                |
| 11-246        | 0.9582                |
| 11-274        | 0.9652                |
| 11-306        | 0.7644                |
| 11-311 (2011) | 0.7357                |
| 11-311 (2013) | 0.9469                |

| Patient       | Correlation ( $r^2$ ) |
|---------------|-----------------------|
| 12-019        | 0.9306                |
| 12-071 (2012) | 0.961                 |
| 12-071 (2013) | 0.962                 |
| 12-074        | 0.9406                |
| 12-109        | 0.9409                |
| 12-114        | 0.7787                |
| 12-170        | 0.9243                |
| 12-185        | 0.9058                |
| 12-210        | 0.8208                |
| 13-045        | 0.9612                |
| 13-054        | 0.9423                |
| 13-019        | 0.7381                |
| 13-153        | 0.9475                |
| 13-162        | 0.9554                |
| 13-215        | 0.5625                |
| 13-219        | 0.9255                |
| 14-044        | 0.891                 |
| 15-393        | 0.9525                |
| Mean          | 0.8945                |
| SD            | 0.0869                |
